# Supplementary material for: Correction: The Natural Pesticide Dihydrorotenone Induces Human Plasma Cell Apoptosis by Triggering Endoplasmic Reticulum Stress and Activating p38 Signaling Pathway
Source: PubMed Central journal article supplement (PMC7266331; doi:10.1371/journal.pone.0234162), 2020-06-02
Supplement: pone.0234162.s001.pdf [file pone.0234162.s001.pdf]

The Raw data regarding the paper “The natural pesticide dihydrorotenone induces human plasma cell apoptosis by triggering endoplasmic reticulum stress and activating p38 signaling pathway”, *PLoS One*. 2013; 8(7):e69911. doi: 10.1371/journal.pone.0069911.

## Flow analysis on LP1 ---Original data

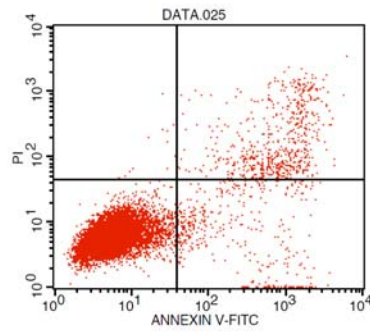

Quadrant Statistics

Sample ID: lp1 btb 0  
 Gate: G1  
 Gated Events: 9485  
 Total Events: 10000  
 X Parameter: ANNEXIN V-FITC (Log)  
 Y Parameter: PI (Log)

| Quad | Events | % Gated | % Total |
|------|--------|---------|---------|
| UL   | 12     | 0.13    | 0.12    |
| UR   | 629    | 6.63    | 6.29    |
| LL   | 8411   | 88.68   | 84.11   |
| LR   | 433    | 4.57    | 4.33    |

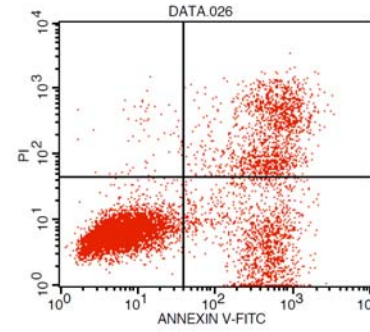

Quadrant Statistics

Sample ID: lp1 btb 5  
 Gate: G1  
 Gated Events: 9026  
 Total Events: 10000  
 X Parameter: ANNEXIN V-FITC (Log)  
 Y Parameter: PI (Log)

| Quad | Events | % Gated | % Total |
|------|--------|---------|---------|
| UL   | 59     | 0.65    | 0.59    |
| UR   | 1533   | 16.98   | 15.33   |
| LL   | 5994   | 66.41   | 59.94   |
| LR   | 1440   | 15.95   | 14.40   |

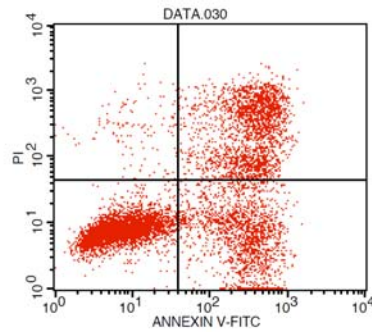

Quadrant Statistics

Sample ID: lp1 btb 15  
 Gate: G1  
 Gated Events: 8415  
 Total Events: 10000  
 X Parameter: ANNEXIN V-FITC (Log)  
 Y Parameter: PI (Log)

| Quad | Events | % Gated | % Total |
|------|--------|---------|---------|
| UL   | 124    | 1.47    | 1.24    |
| UR   | 2261   | 26.87   | 22.61   |
| LL   | 4320   | 51.34   | 43.20   |
| LR   | 1710   | 20.32   | 17.10   |

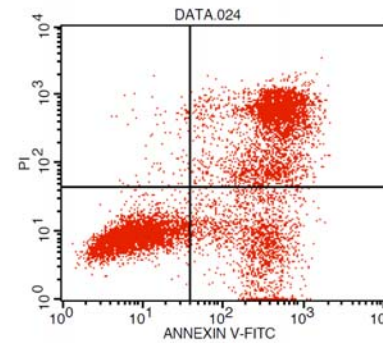

Quadrant Statistics

Sample ID: lp1 btb 30  
 Gate: G1  
 Gated Events: 8924  
 Total Events: 10000  
 X Parameter: ANNEXIN V-FITC (Log)  
 Y Parameter: PI (Log)

| Quad | Events | % Gated | % Total |
|------|--------|---------|---------|
| UL   | 78     | 0.87    | 0.78    |
| UR   | 3578   | 40.09   | 35.78   |
| LL   | 3651   | 40.91   | 36.51   |
| LR   | 1617   | 18.12   | 16.17   |

Figure 1, FLOW original readout

## Flow analysis on OPM2---Original data

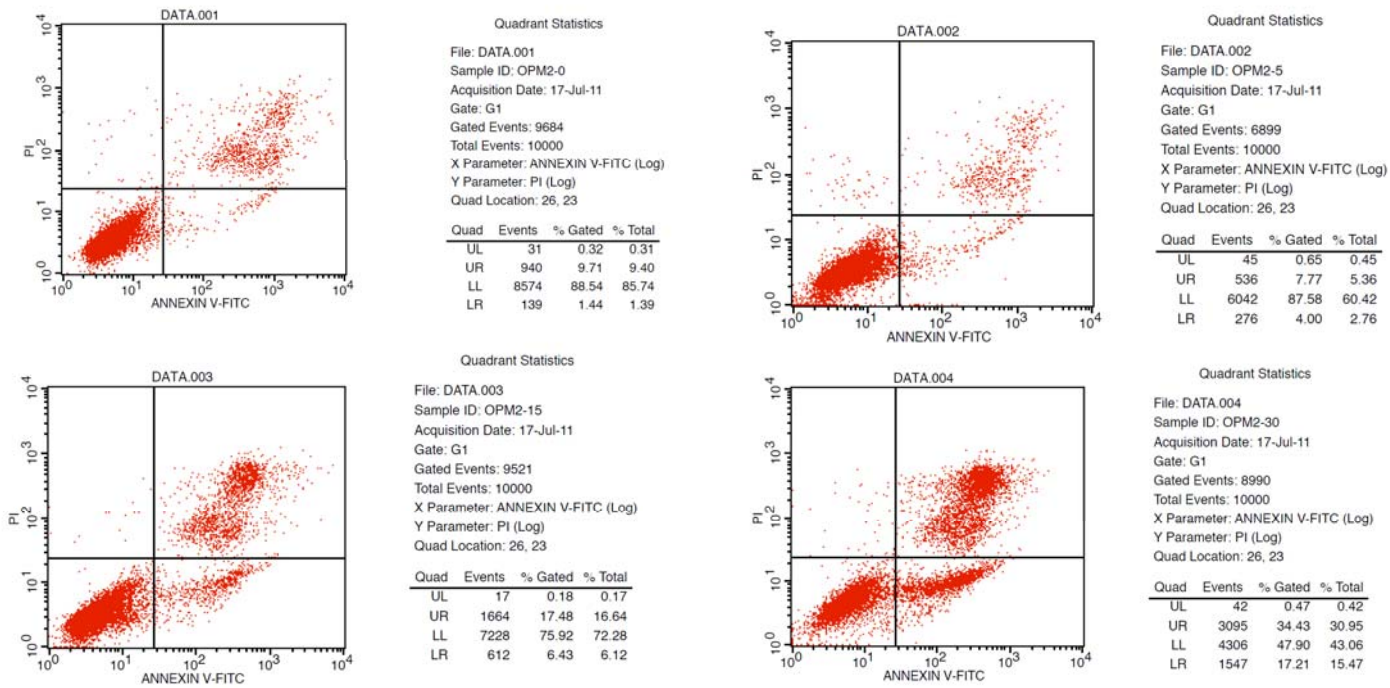

Figure 1, FLOW original readout

## Flow analysis on KMS11---Original data

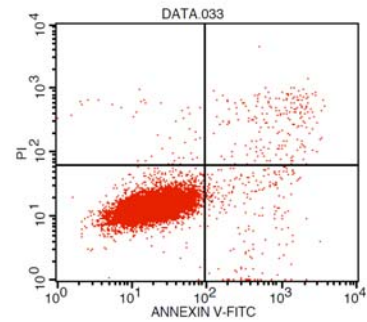

Quadrant Statistics

File: DATA.033  
 Sample ID: KMS11 0  
 Panel: Untitled Acquisition Tube List  
 Acquisition Date: 01-Jun-11  
 Gate: G1  
 Gated Events: 9703  
 Total Events: 10000  
 X Parameter: ANNEXIN V-FITC (Log)  
 Y Parameter: PI (Log)

| Quad | Events | % Gated | % Total |
|------|--------|---------|---------|
| UL   | 46     | 0.47    | 0.46    |
| UR   | 204    | 2.10    | 2.04    |
| LL   | 9231   | 95.14   | 92.31   |
| LR   | 222    | 2.29    | 2.22    |

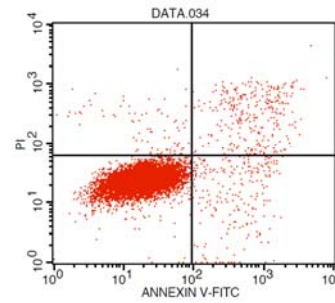

Quadrant Statistics

File: DATA.034  
 Sample ID: KMS11 5  
 Panel: Untitled Acquisition Tube List  
 Acquisition Date: 01-Jun-11  
 Gate: G1  
 Gated Events: 9651  
 Total Events: 10000  
 X Parameter: ANNEXIN V-FITC (Log)  
 Y Parameter: PI (Log)

| Quad | Events | % Gated | % Total |
|------|--------|---------|---------|
| UL   | 83     | 0.86    | 0.83    |
| UR   | 304    | 3.15    | 3.04    |
| LL   | 9039   | 93.66   | 90.39   |
| LR   | 225    | 2.33    | 2.25    |

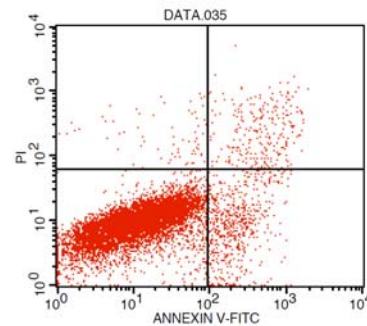

Quadrant Statistics

File: DATA.035  
 Sample ID: KMS11 15  
 Panel: Untitled Acquisition Tube List  
 Acquisition Date: 01-Jun-11  
 Gate: G1  
 Gated Events: 9253  
 Total Events: 10000  
 X Parameter: ANNEXIN V-FITC (Log)  
 Y Parameter: PI (Log)

| Quad | Events | % Gated | % Total |
|------|--------|---------|---------|
| UL   | 68     | 0.73    | 0.68    |
| UR   | 259    | 2.80    | 2.59    |
| LL   | 8337   | 90.10   | 83.37   |
| LR   | 589    | 6.37    | 5.89    |

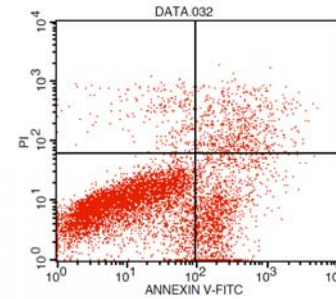

Quadrant Statistics

File: DATA.032  
 Sample ID: KMS11 30  
 Panel: Untitled Acquisition Tube List  
 Acquisition Date: 01-Jun-11  
 Gate: G1  
 Gated Events: 7908  
 Total Events: 10000  
 X Parameter: ANNEXIN V-FITC (Log)  
 Y Parameter: PI (Log)

| Quad | Events | % Gated | % Total |
|------|--------|---------|---------|
| UL   | 236    | 2.98    | 2.36    |
| UR   | 635    | 8.03    | 6.35    |
| LL   | 5601   | 70.83   | 56.01   |
| LR   | 1436   | 18.16   | 14.36   |

Figure 1, FLOW original readout

## Flow analysis on U266---Original data

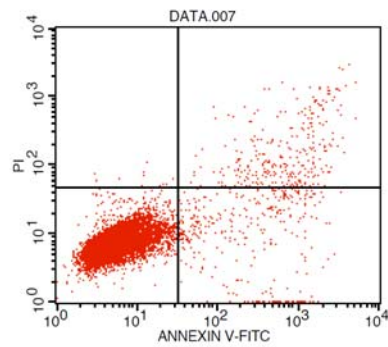

Quadrant Statistics

File: DATA.007  
 Sample ID: U266-0  
 Tube: Untitled  
 Acquisition Date: 11-Jun-11

| Quad | Events | % Gated | % Total |
|------|--------|---------|---------|
| UL   | 12     | 0.12    | 0.12    |
| UR   | 289    | 2.94    | 2.89    |
| LL   | 9166   | 93.31   | 91.66   |
| LR   | 356    | 3.62    | 3.56    |

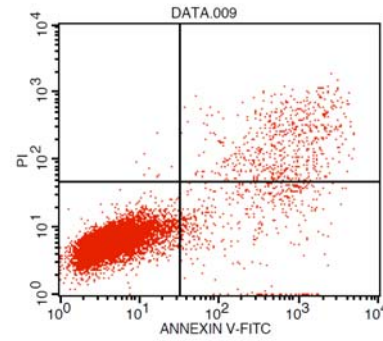

Quadrant Statistics

File: DATA.009  
 Sample ID: U266-5  
 Tube: Untitled  
 Acquisition Date: 11-Jun-11

| Quad | Events | % Gated | % Total |
|------|--------|---------|---------|
| UL   | 10     | 0.10    | 0.10    |
| UR   | 605    | 6.15    | 6.05    |
| LL   | 8752   | 88.95   | 87.52   |
| LR   | 472    | 4.80    | 4.72    |

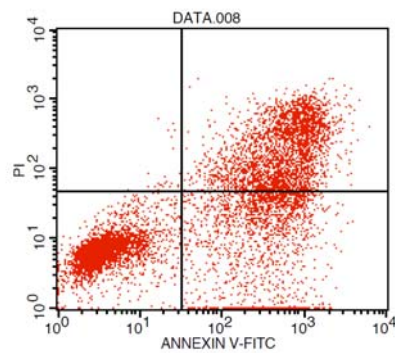

Quadrant Statistics

File: DATA.008  
 Sample ID: U266-15  
 Tube: Untitled  
 Acquisition Date: 11-Jun-11

| Quad | Events | % Gated | % Total |
|------|--------|---------|---------|
| UL   | 24     | 0.28    | 0.24    |
| UR   | 2866   | 33.33   | 28.66   |
| LL   | 3973   | 46.21   | 39.73   |
| LR   | 1735   | 20.18   | 17.35   |

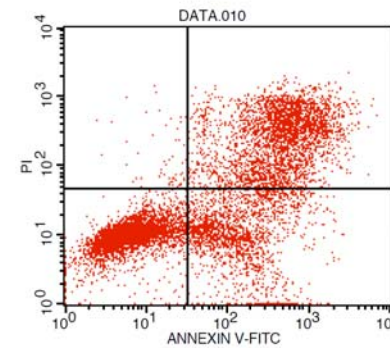

Quadrant Statistics

File: DATA.010  
 Sample ID: U266-30  
 Tube: Untitled  
 Acquisition Date: 11-Jun-11

| Quad | Events | % Gated | % Total |
|------|--------|---------|---------|
| UL   | 57     | 0.62    | 0.57    |
| UR   | 3243   | 35.10   | 32.43   |
| LL   | 3990   | 43.18   | 39.90   |
| LR   | 1950   | 21.10   | 19.50   |

Figure 1, FLOW original readout

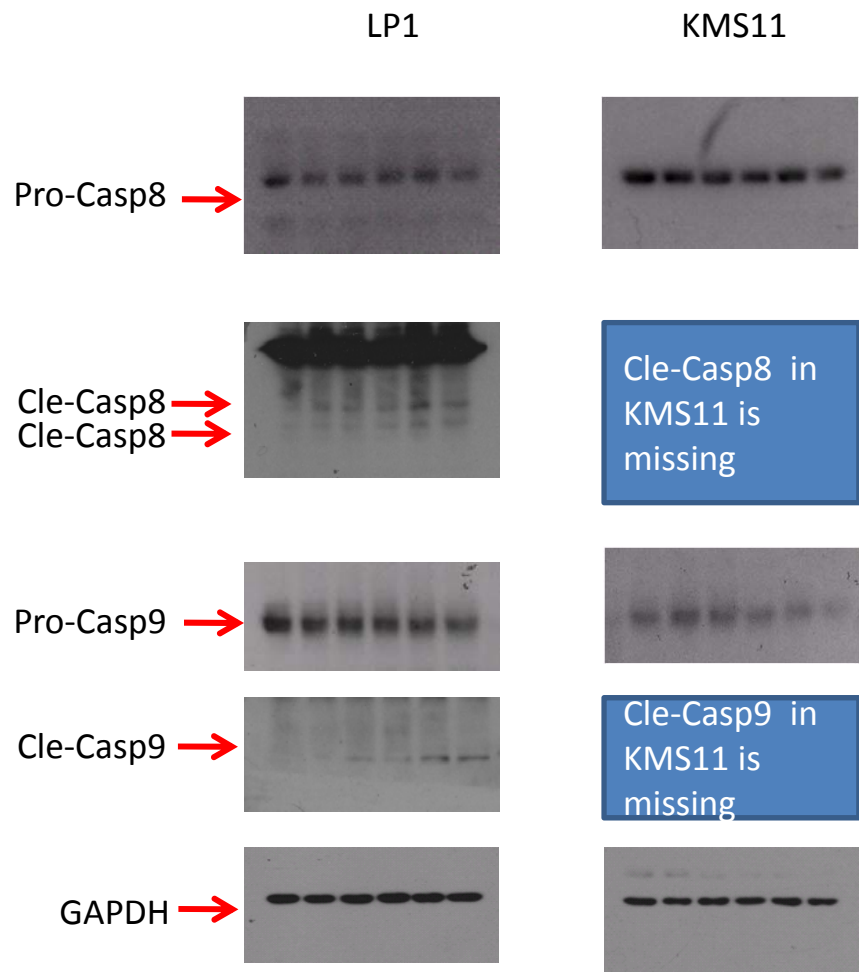

Fig. 2A

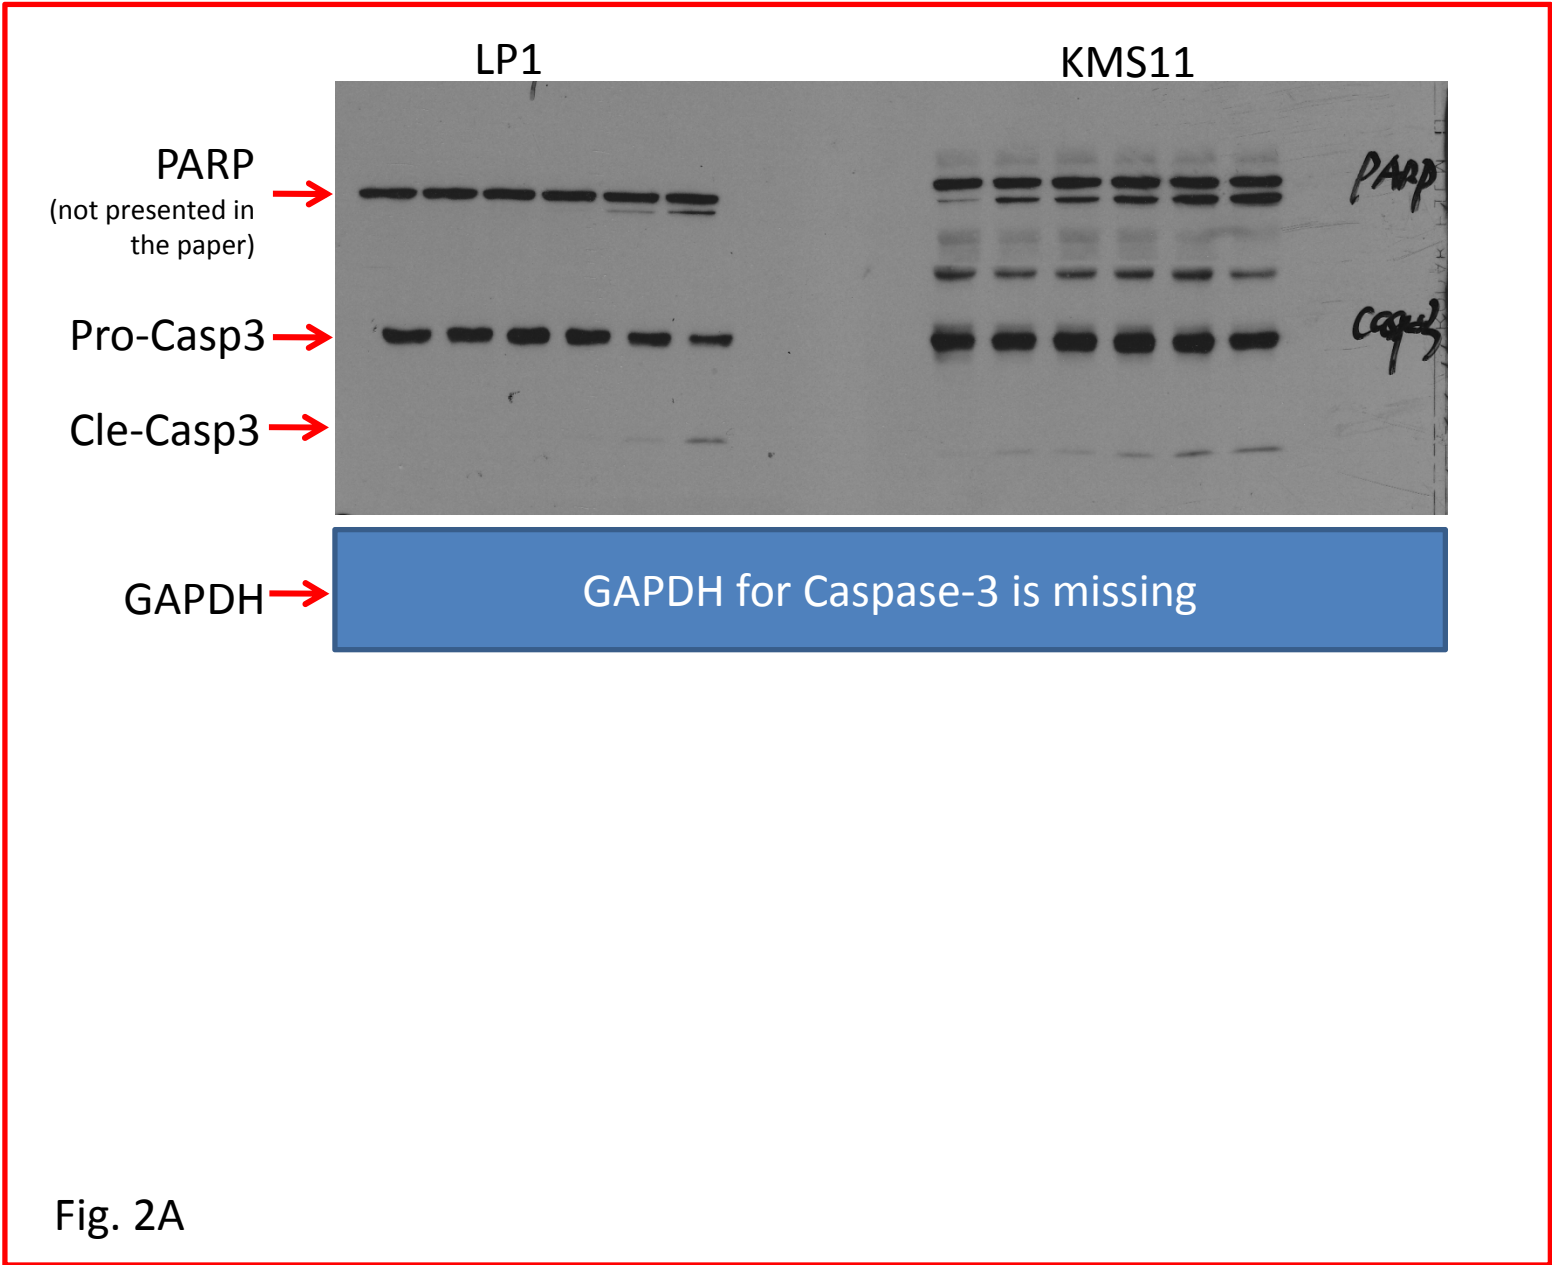

Fig. 2A

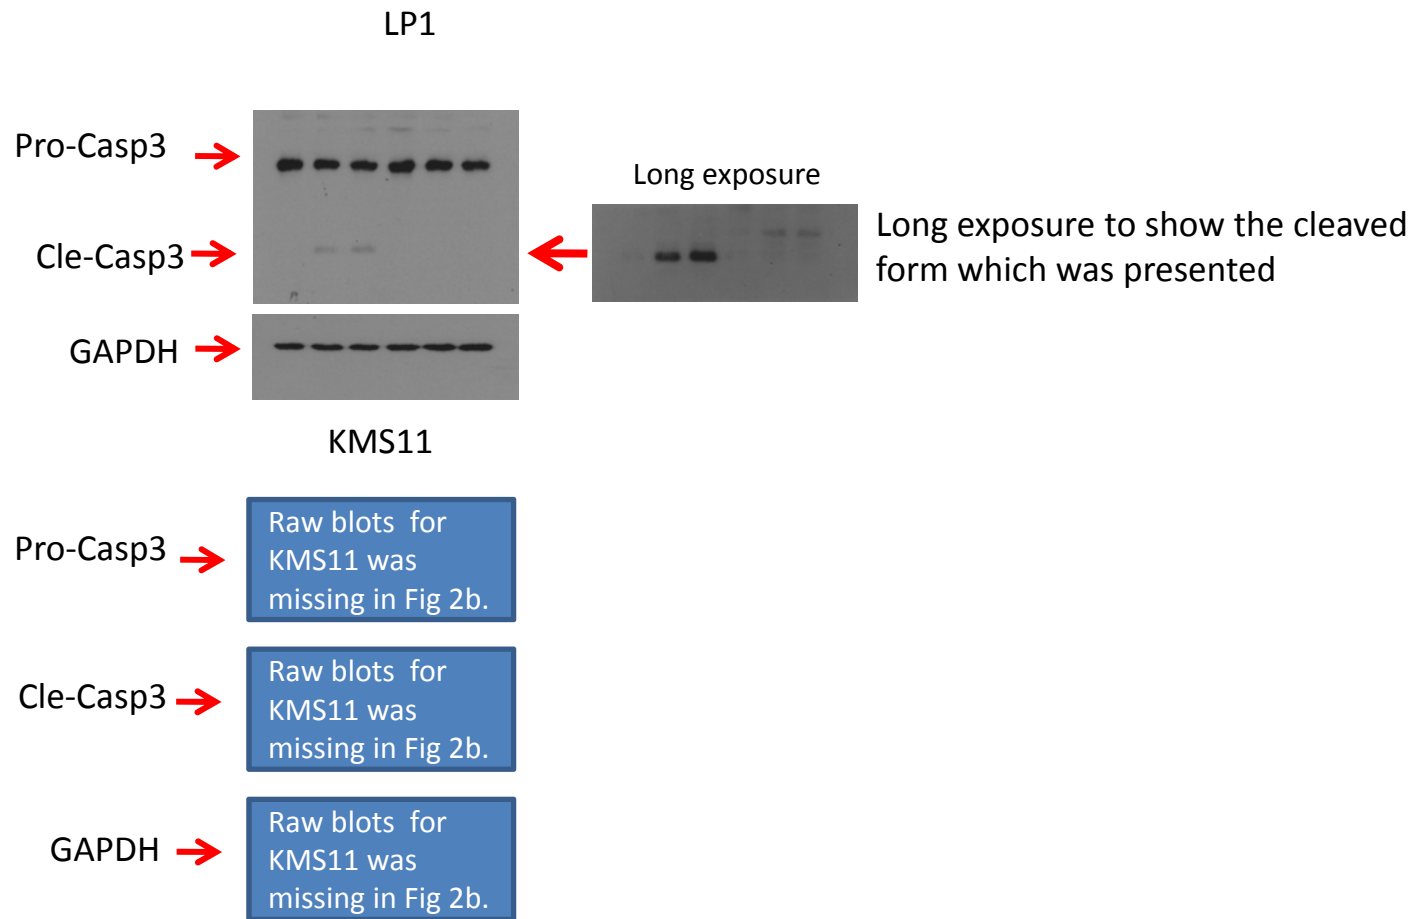

Fig. 2B



Figure 2C for LP1

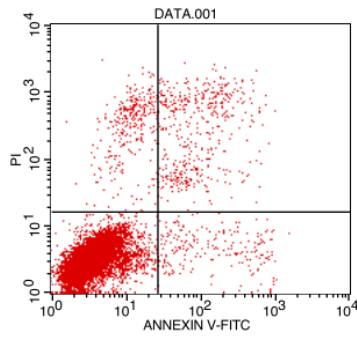

Control only

Sample ID: LP1-ctl

| Quad | Events | % Gated | % Total |
|------|--------|---------|---------|
| UL   | 299    | 3.14    | 2.99    |
| UR   | 451    | 4.74    | 4.51    |
| LL   | 8555   | 89.83   | 85.55   |
| LR   | 219    | 2.30    | 2.19    |

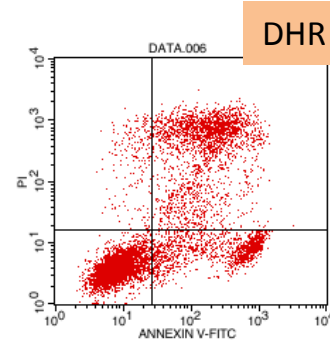

DHR only

Sample ID: LP1-dhr

| Quad | Events | % Gated | % Total |
|------|--------|---------|---------|
| UL   | 225    | 2.60    | 2.25    |
| UR   | 2382   | 27.57   | 23.82   |
| LL   | 4639   | 53.69   | 46.39   |
| LR   | 1395   | 16.14   | 13.95   |

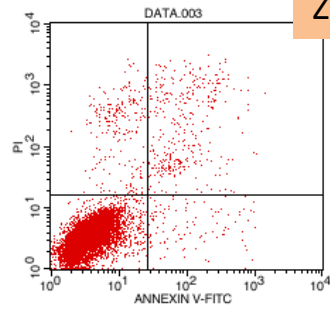

Z-VAD only

Sample ID: LP1-z-vad

| Quad | Events | % Gated | % Total |
|------|--------|---------|---------|
| UL   | 217    | 2.24    | 2.17    |
| UR   | 358    | 3.70    | 3.58    |
| LL   | 8990   | 92.94   | 89.90   |
| LR   | 108    | 1.12    | 1.08    |

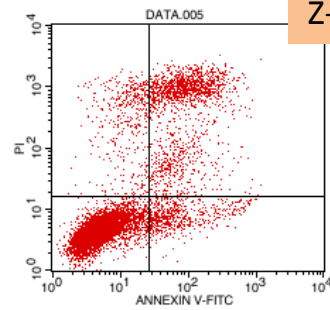

Z-VAD + DHR

Sample ID: LP1-dhr+z-vad

| Quad | Events | % Gated | % Total |
|------|--------|---------|---------|
| UL   | 457    | 5.01    | 4.57    |
| UR   | 1690   | 18.53   | 16.90   |
| LL   | 6340   | 69.53   | 63.40   |
| LR   | 632    | 6.93    | 6.32    |

Figure 2C for KMS11

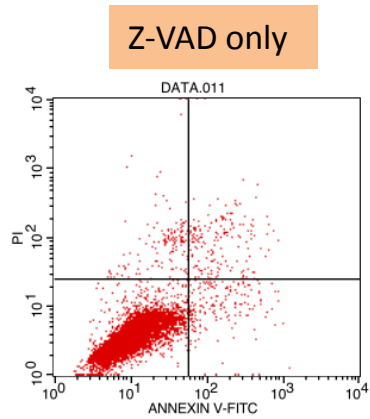

Sample ID: kms z-vad

| Quad | Events | % Gated | % Total |
|------|--------|---------|---------|
| UL   | 135    | 1.40    | 1.35    |
| UR   | 169    | 1.75    | 1.69    |
| LL   | 9160   | 94.82   | 91.60   |
| LR   | 196    | 2.03    | 1.96    |

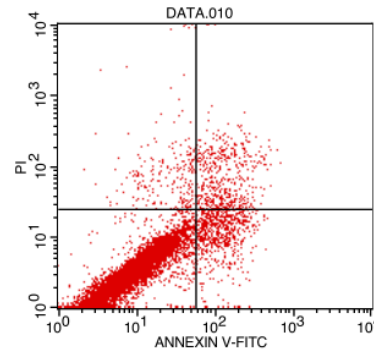

**DHR only**

Sample ID: kms dhr

| Quad | Events | % Gated | % Total |
|------|--------|---------|---------|
| UL   | 213    | 2.58    | 2.13    |
| UR   | 481    | 5.82    | 4.81    |
| LL   | 6857   | 82.91   | 68.57   |
| LR   | 719    | 8.69    | 7.19    |

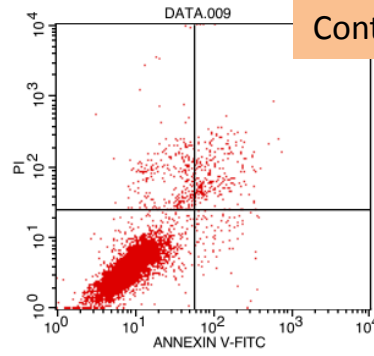

**Control only**

Sample ID: kms ctl

| Quad | Events | % Gated | % Total |
|------|--------|---------|---------|
| UL   | 261    | 2.75    | 2.61    |
| UR   | 246    | 2.59    | 2.46    |
| LL   | 8921   | 93.83   | 89.21   |
| LR   | 80     | 0.84    | 0.80    |

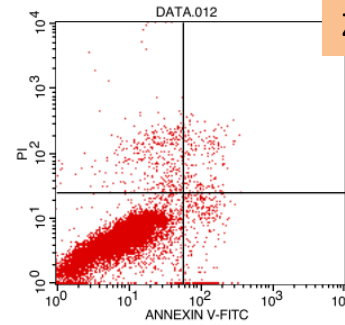

**Z-VAD + DHR**

Sample ID: kms z-vad+dhr

| Quad | Events | % Gated | % Total |
|------|--------|---------|---------|
| UL   | 345    | 4.20    | 3.45    |
| UR   | 177    | 2.16    | 1.77    |
| LL   | 7425   | 90.47   | 74.25   |
| LR   | 260    | 3.17    | 2.60    |

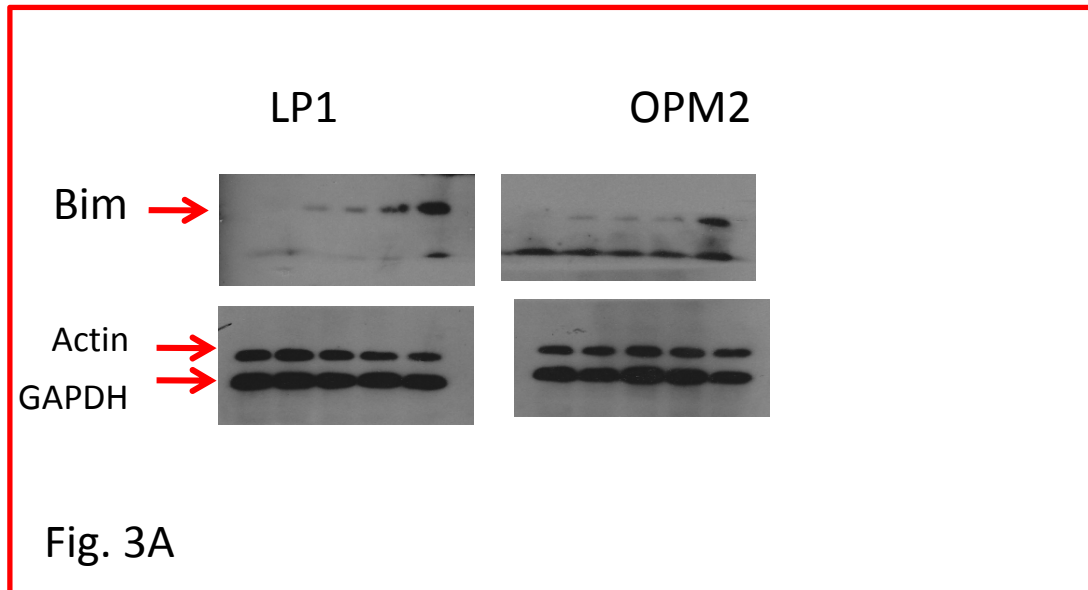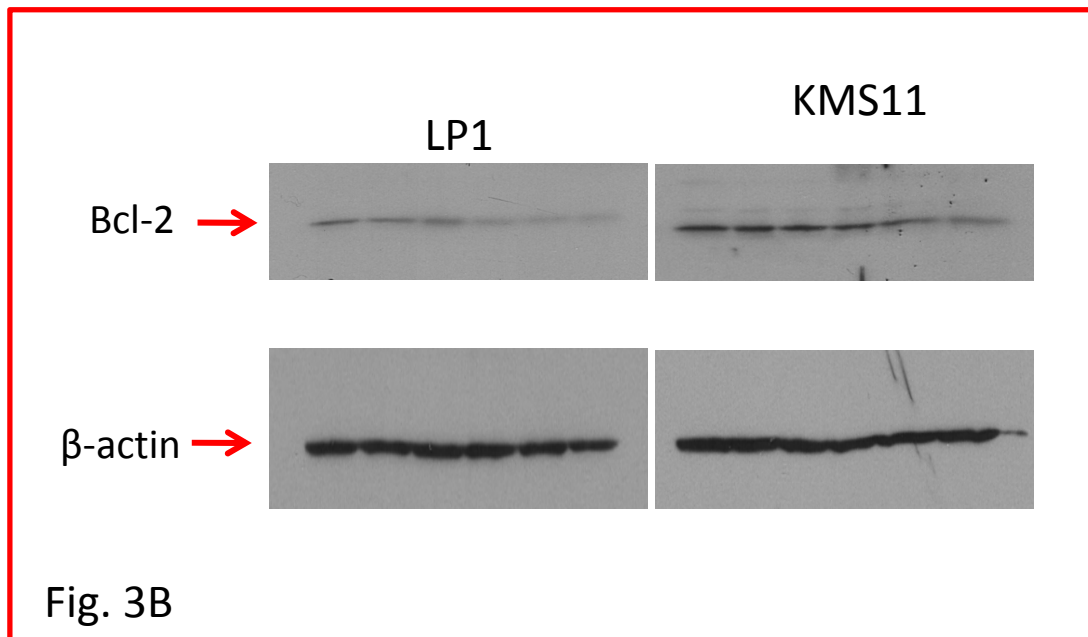

Figure 4A. DHR leads to mitochondrial membrane potential collapse stained by TRAM only

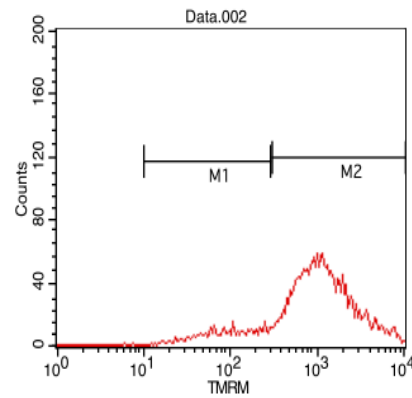

Histogram Statistics

File: Data.002  
 Sample ID: LP1-SS-0  
 Tube: Untitled  
 Panel: Untitled Acquisition Tube List  
 Acquisition Date: 18-Oct-12  
 Gate: G1  
 Gated Events: 9700  
 Total Events: 10000

| Marker | Left, Right | Events | % Gated | % Total |
|--------|-------------|--------|---------|---------|
| All    | 1, 9910     | 9700   | 100.00  | 97.00   |
| M1     | 10, 286     | 1280   | 13.20   | 12.80   |
| M2     | 300, 9910   | 8384   | 86.43   | 83.84   |

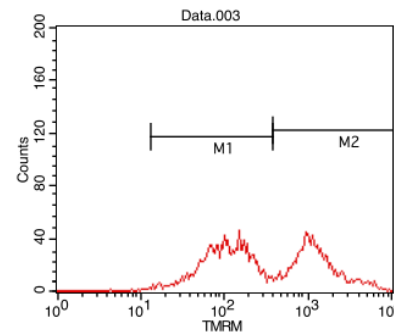

Histogram Statistics

File: Data.003  
 Log Data Units: Linear Values  
 Sample ID: LP1-SS-10DHR  
 Acquisition Date: 18-Oct-12  
 Gate: G1  
 Gated Events: 9150  
 Total Events: 10000  
 X Parameter: TMRM (Log)

| Marker | Left, Right | Events | % Gated | % Total |
|--------|-------------|--------|---------|---------|
| All    | 1, 9910     | 9150   | 100.00  | 91.50   |
| M1     | 13, 375     | 5102   | 55.76   | 51.02   |
| M2     | 375, 9910   | 4045   | 44.21   | 40.45   |

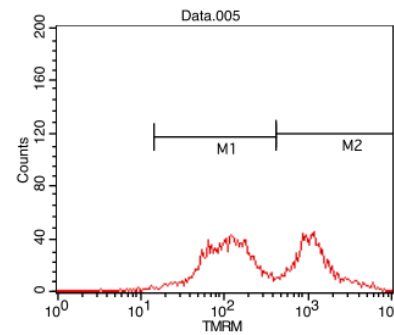

Histogram Statistics

File: Data.005  
 Log Data Units: Linear Values  
 Sample ID: LP1-SS-20DHR  
 Acquisition Date: 18-Oct-12  
 Gate: G1  
 Gated Events: 9270  
 Total Events: 10000  
 X Parameter: TMRM (Log)

| Marker | Left, Right | Events | % Gated | % Total |
|--------|-------------|--------|---------|---------|
| All    | 1, 9910     | 9270   | 100.00  | 92.70   |
| M1     | 14, 410     | 5490   | 59.22   | 54.90   |
| M2     | 410, 9910   | 3763   | 40.59   | 37.63   |

Figure 4B. DHR leads to mitochondrial membrane potential collapse stained by TRAM (FL2) and Annexin V (FL1)

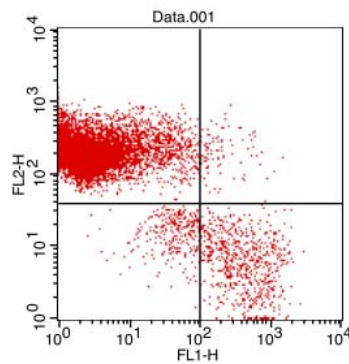

Quadrant Statistics

File: Data.001  
 Log Data Units: Linear Values  
 Sample ID: LP1-DS-0  
 Gate: G1  
 Gated Events: 8881  
 Total Events: 10000  
 X Parameter: FL1-H (Log)  
 Y Parameter: FL2-H (Log)

| Quad | Events | % Gated | % Total |
|------|--------|---------|---------|
| UL   | 7861   | 88.51   | 78.61   |
| UR   | 97     | 1.09    | 0.97    |
| LL   | 272    | 3.06    | 2.72    |
| LR   | 651    | 7.33    | 6.51    |

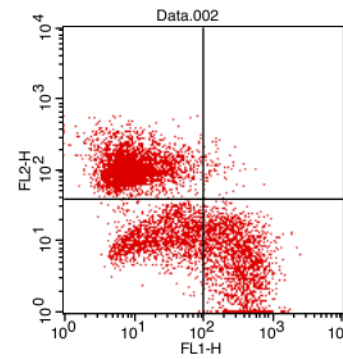

Quadrant Statistics

File: Data.002  
 Log Data Units: Linear Values  
 Sample ID: LP1-DS-10DHR  
 Gate: G1  
 Gated Events: 7033  
 Total Events: 10000  
 X Parameter: FL1-H (Log)  
 Y Parameter: FL2-H (Log)

| Quad | Events | % Gated | % Total |
|------|--------|---------|---------|
| UL   | 3529   | 50.18   | 35.29   |
| UR   | 69     | 0.98    | 0.69    |
| LL   | 1529   | 21.74   | 15.29   |
| LR   | 1906   | 27.10   | 19.06   |

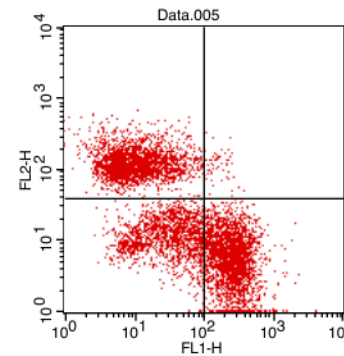

Quadrant Statistics

File: Data.005  
 Log Data Units: Linear Values  
 Sample ID: LP1-DS-5SB+20DHR  
 Gate: G1  
 Gated Events: 7030  
 Total Events: 10000  
 X Parameter: FL1-H (Log)  
 Y Parameter: FL2-H (Log)

| Quad | Events | % Gated | % Total |
|------|--------|---------|---------|
| UL   | 2753   | 39.16   | 27.53   |
| UR   | 63     | 0.90    | 0.63    |
| LL   | 1572   | 22.36   | 15.72   |
| LR   | 2642   | 37.58   | 26.42   |

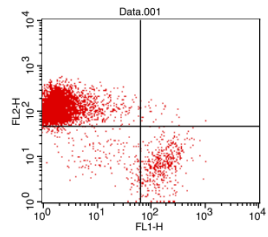

Quadrant Statistics

File: Data.001  
 Sample ID: LP1-DS-0  
 Gate: G1  
 Gated Events: 7835  
 Total Events: 10000  
 X Parameter: FL1-H (Log)  
 Y Parameter: FL2-H (Log)

| Quad | Events | % Gated | % Total |
|------|--------|---------|---------|
| UL   | 7094   | 90.54   | 70.94   |
| UR   | 26     | 0.33    | 0.26    |
| LL   | 234    | 2.99    | 2.34    |
| LR   | 481    | 6.14    | 4.81    |

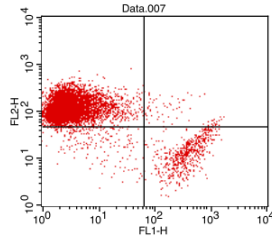

Quadrant Statistics

File: Data.007  
 Sample ID: LP1-DS-0.54h-20uMDHR  
 Gate: G1  
 Gated Events: 7959  
 Total Events: 10000  
 X Parameter: FL1-H (Log)  
 Y Parameter: FL2-H (Log)

| Quad | Events | % Gated | % Total |
|------|--------|---------|---------|
| UL   | 7132   | 89.61   | 71.32   |
| UR   | 74     | 0.93    | 0.74    |
| LL   | 208    | 2.61    | 2.08    |
| LR   | 545    | 6.85    | 5.45    |

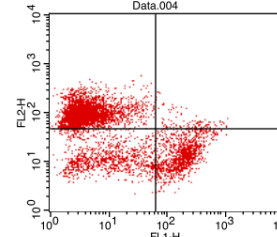

Quadrant Statistics

File: Data.004  
 Sample ID: LP1-DS-8h-20uMDHR  
 Gate: G1  
 Gated Events: 6404  
 Total Events: 10000  
 X Parameter: FL1-H (Log)  
 Y Parameter: FL2-H (Log)

| Quad | Events | % Gated | % Total |
|------|--------|---------|---------|
| UL   | 4055   | 63.32   | 40.55   |
| UR   | 110    | 1.72    | 1.10    |
| LL   | 1053   | 16.44   | 10.53   |
| LR   | 1186   | 18.52   | 11.86   |

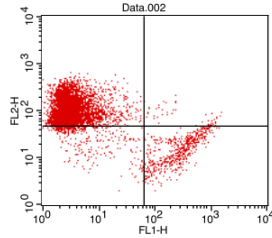

Quadrant Statistics

File: Data.002  
 Sample ID: LP1-DS-1h-20uMDHR  
 Gate: G1  
 Gated Events: 7798  
 Total Events: 10000  
 X Parameter: FL1-H (Log)  
 Y Parameter: FL2-H (Log)

| Quad | Events | % Gated | % Total |
|------|--------|---------|---------|
| UL   | 6714   | 86.10   | 67.14   |
| UR   | 47     | 0.60    | 0.47    |
| LL   | 491    | 6.30    | 4.91    |
| LR   | 546    | 7.00    | 5.46    |

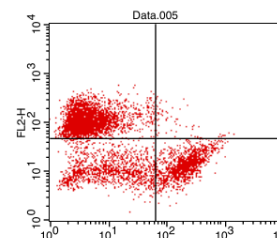

Quadrant Statistics

File: Data.005  
 Sample ID: LP1-DS-12h-20uMDHR  
 Gate: G1  
 Gated Events: 6262  
 Total Events: 10000  
 X Parameter: FL1-H (Log)  
 Y Parameter: FL2-H (Log)

| Quad | Events | % Gated | % Total |
|------|--------|---------|---------|
| UL   | 3649   | 58.27   | 36.49   |
| UR   | 64     | 1.02    | 0.64    |
| LL   | 1250   | 19.96   | 12.50   |
| LR   | 1299   | 20.74   | 12.99   |

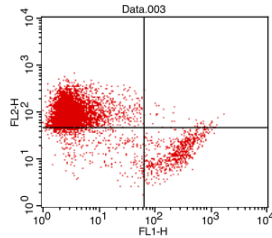

Quadrant Statistics

File: Data.003  
 Sample ID: LP1-DS-4h-20uMDHR  
 Gate: G1  
 Gated Events: 7626  
 Total Events: 10000  
 X Parameter: FL1-H (Log)  
 Y Parameter: FL2-H (Log)

| Quad | Events | % Gated | % Total |
|------|--------|---------|---------|
| UL   | 6415   | 84.12   | 64.15   |
| UR   | 42     | 0.55    | 0.42    |
| LL   | 543    | 7.12    | 5.43    |
| LR   | 626    | 8.21    | 6.26    |

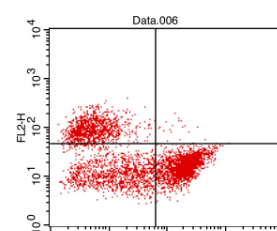

Quadrant Statistics

File: Data.006  
 Sample ID: LP1-DS-24h-20uMDHR  
 Gate: G1  
 Gated Events: 4395  
 Total Events: 10000  
 X Parameter: FL1-H (Log)  
 Y Parameter: FL2-H (Log)

| Quad | Events | % Gated | % Total |
|------|--------|---------|---------|
| UL   | 1118   | 25.44   | 11.18   |
| UR   | 19     | 0.43    | 0.19    |
| LL   | 1233   | 28.05   | 12.33   |
| LR   | 2025   | 46.08   | 20.25   |

Figure 4C.

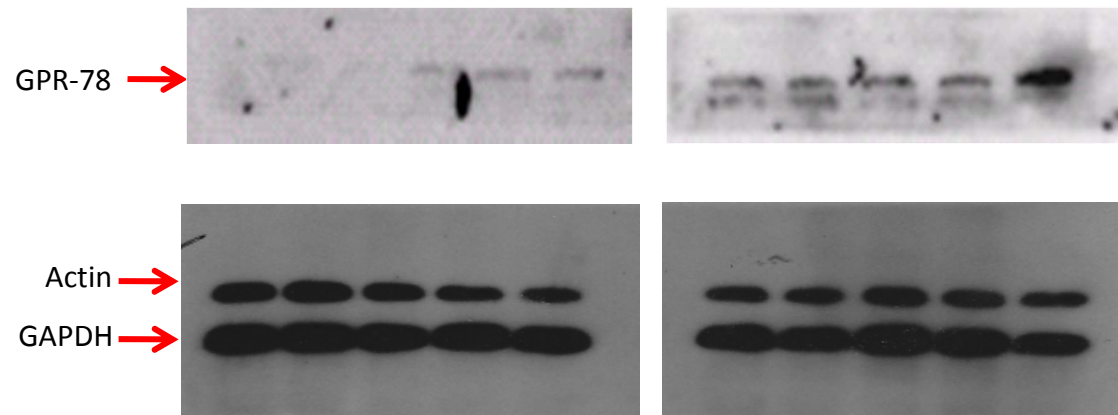

Fig. 5A We used the same blots for Bim (Fig. 3A) and the same Actin control was used.

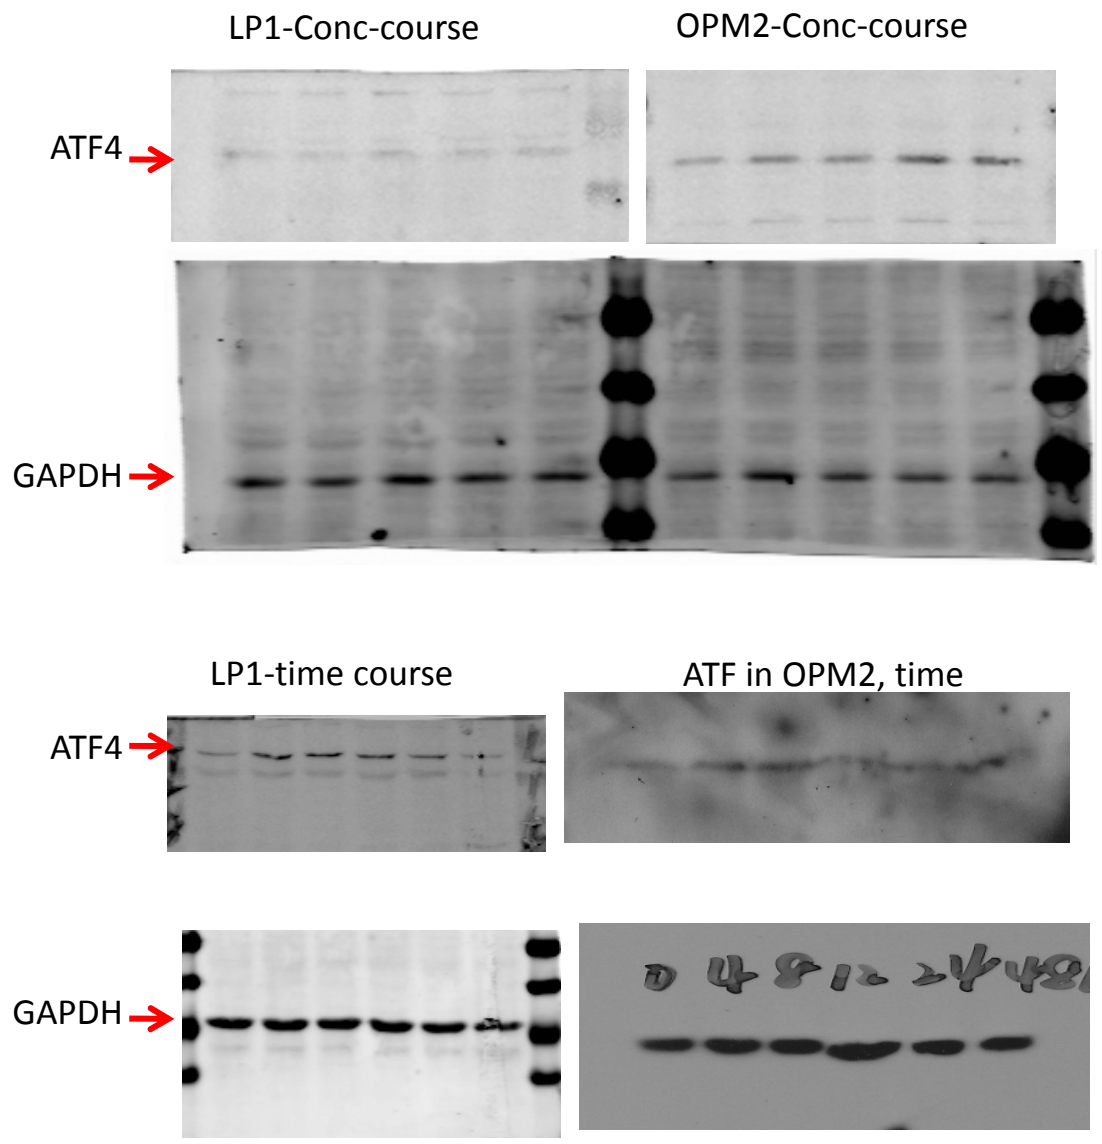

Figure 5B



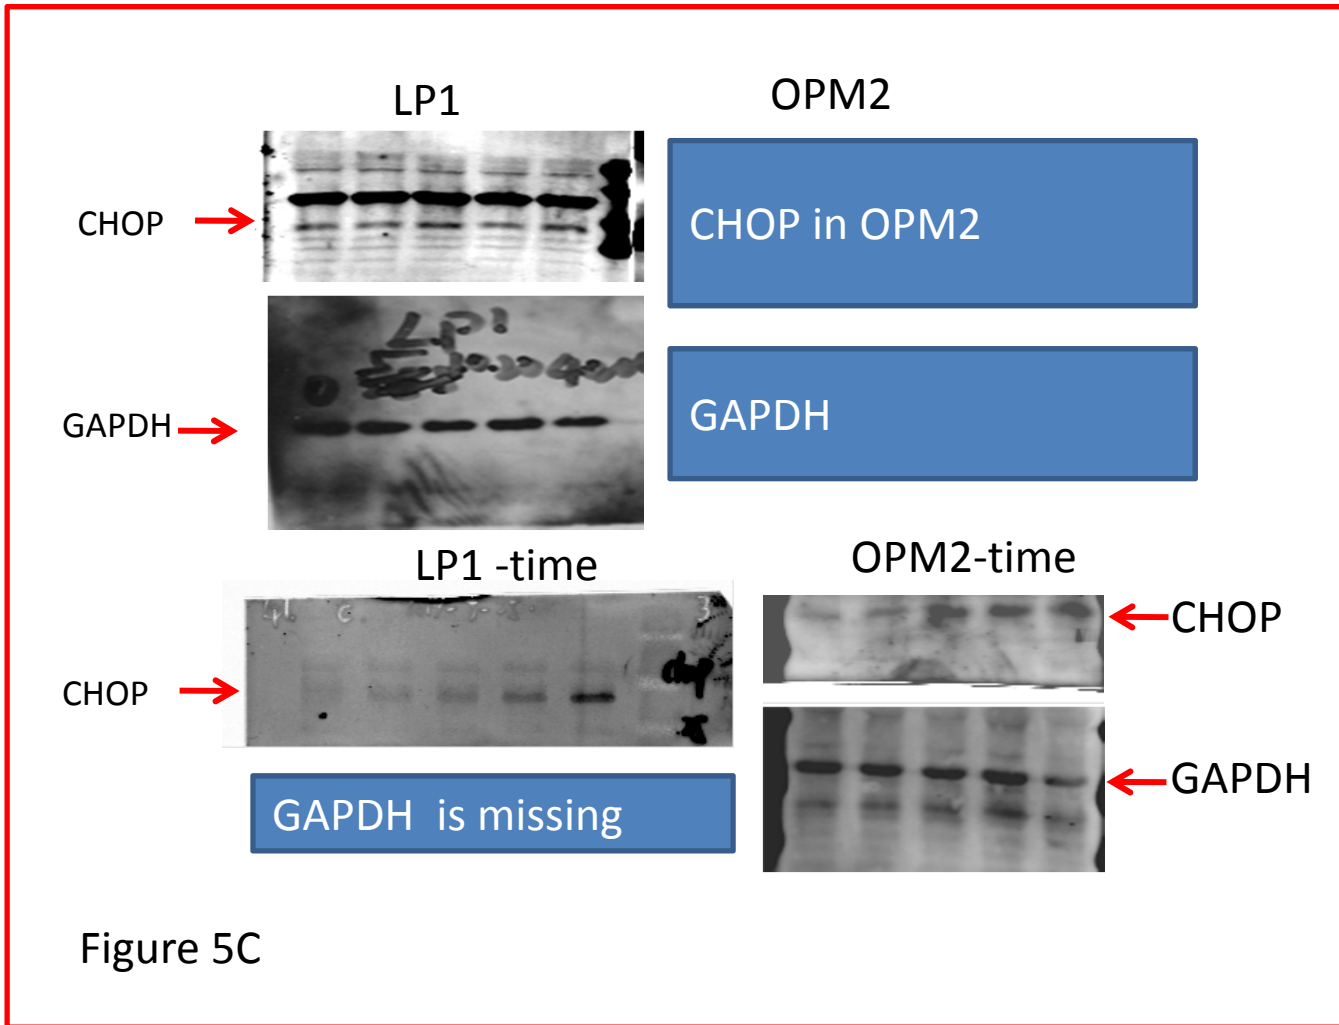

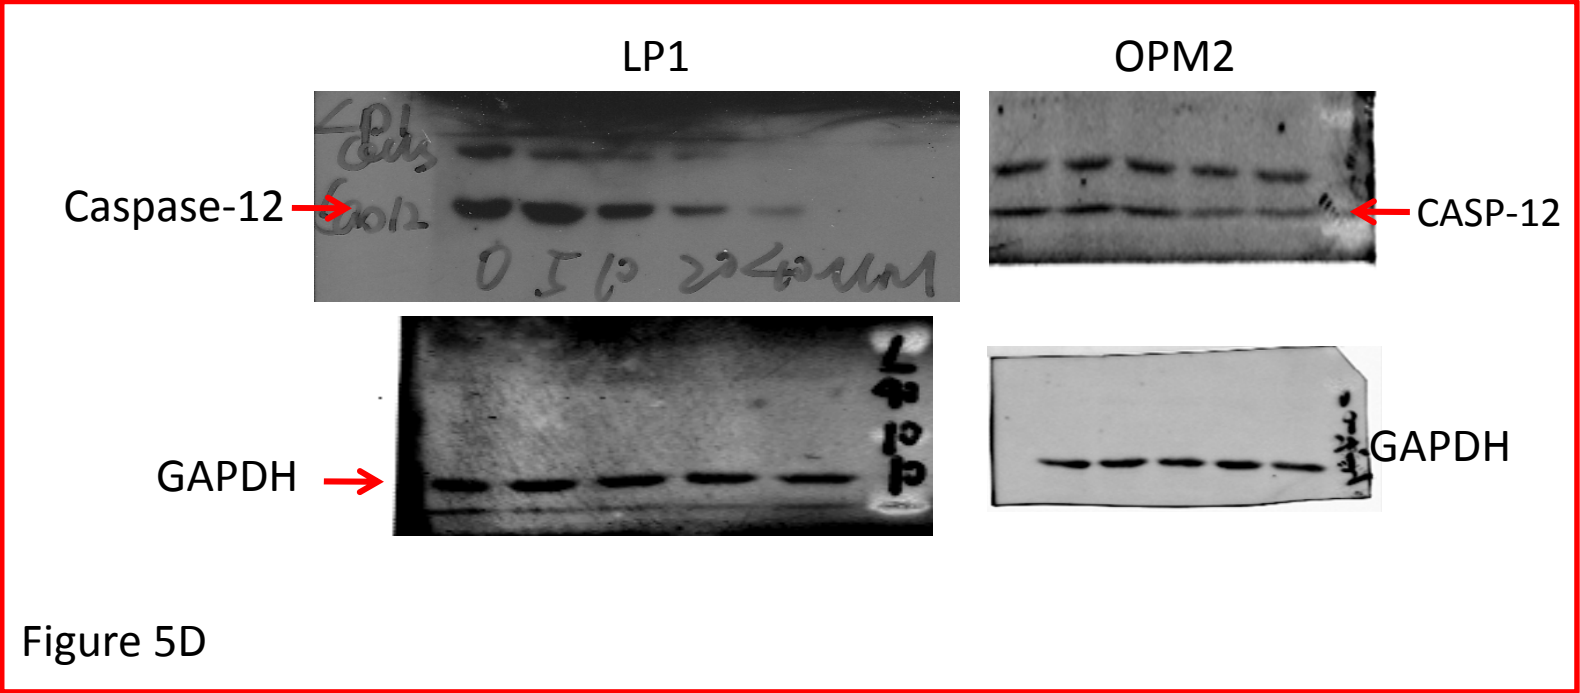

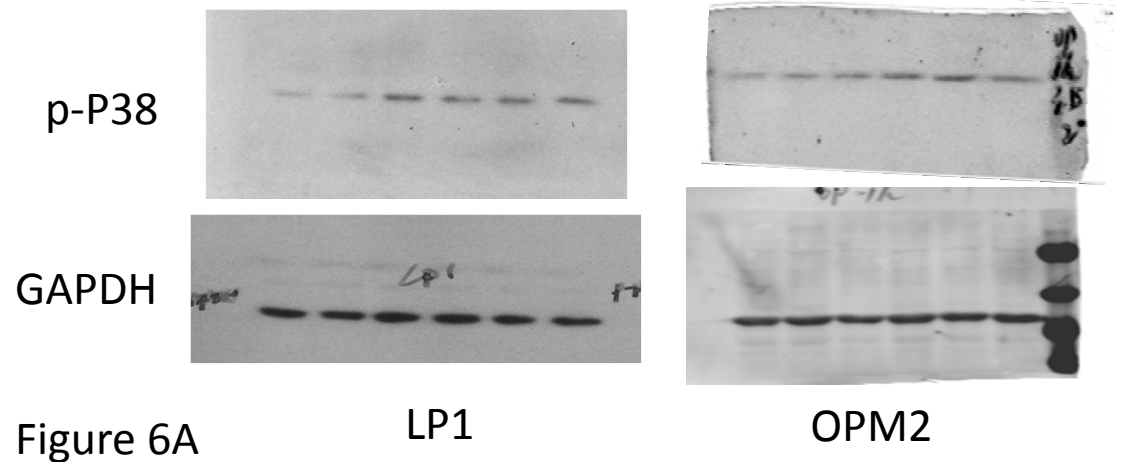

Figure 6A

LP1

OPM2

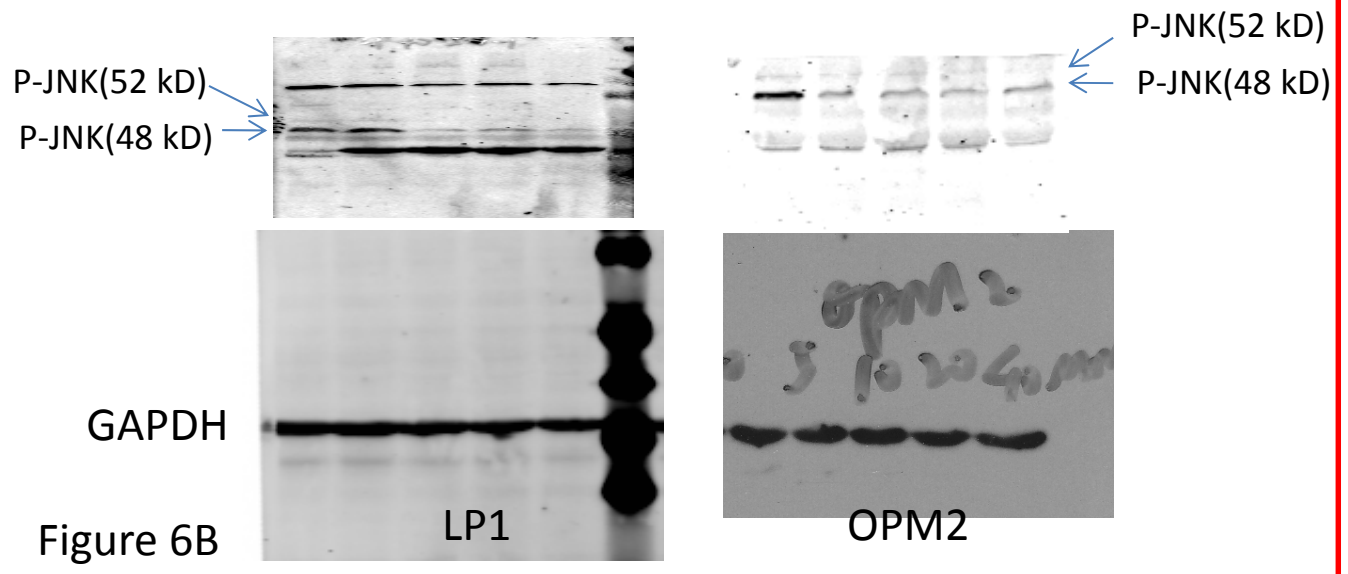

Figure 6B

LP1

OPM2

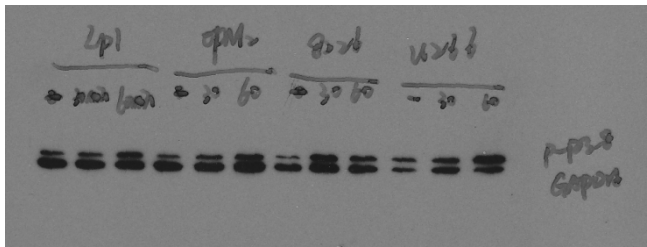

Figure 7A

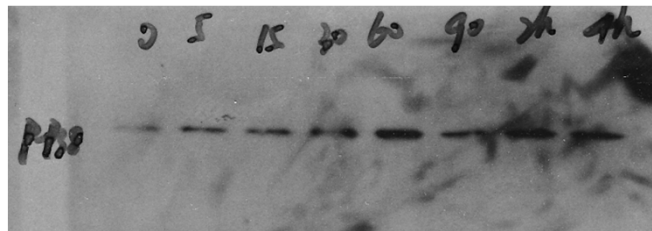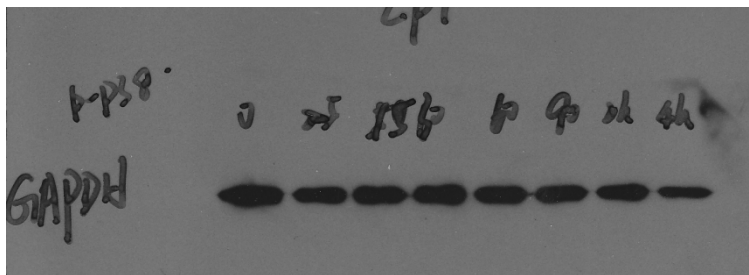

Figure 7B

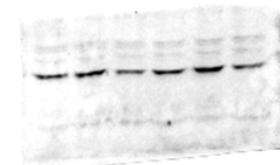

← p-p38

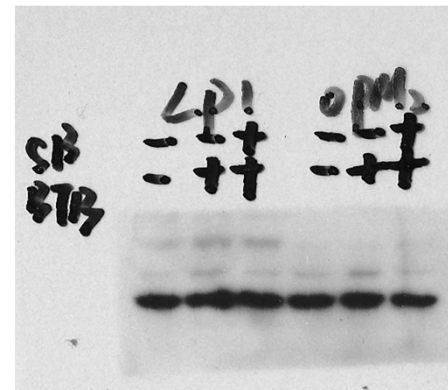

← GAPDH

p-p38 was obtained from this blot with extended exposure.

Figure 7C

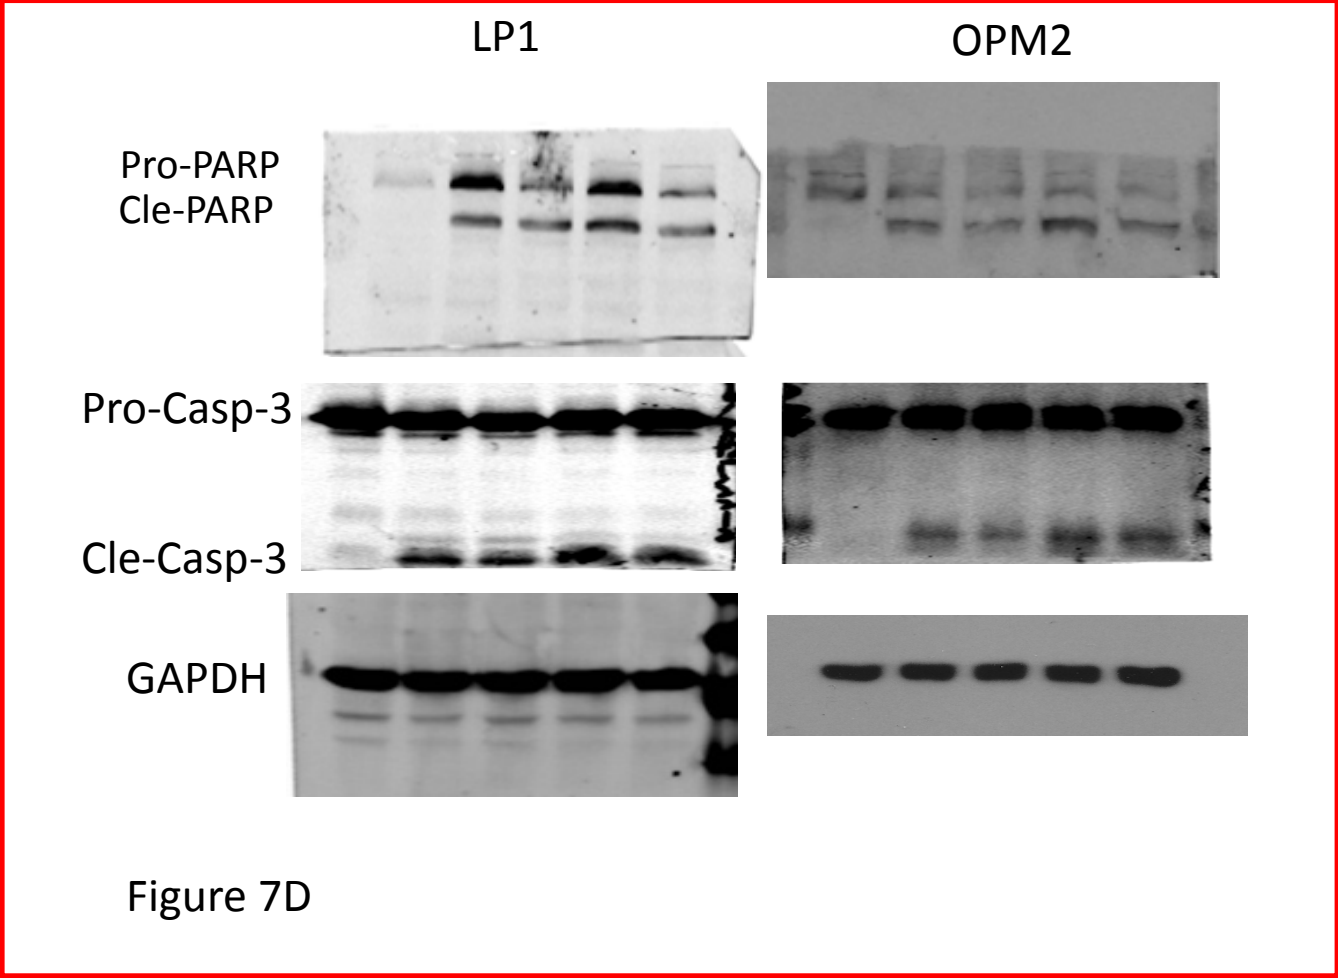

Figure 7D
